# Supplementary material for: A surfactant-free route to single-crystalline CeO2 nanowires
Source: Royal Society of Chemistry journal article supplement (doi:10.1039/b500708a), 2005-01-01
Supplement: b500708a.pdf [file b500708a.pdf]

## Electronic Supporting Information

### A surfactant-free route to single-crystalline CeO<sub>2</sub> nanowires

Bo Tang,\* Linhai Zhuo, Jiechao Ge, Guangli Wang, Zhiqiang Shi, Jinye Niu

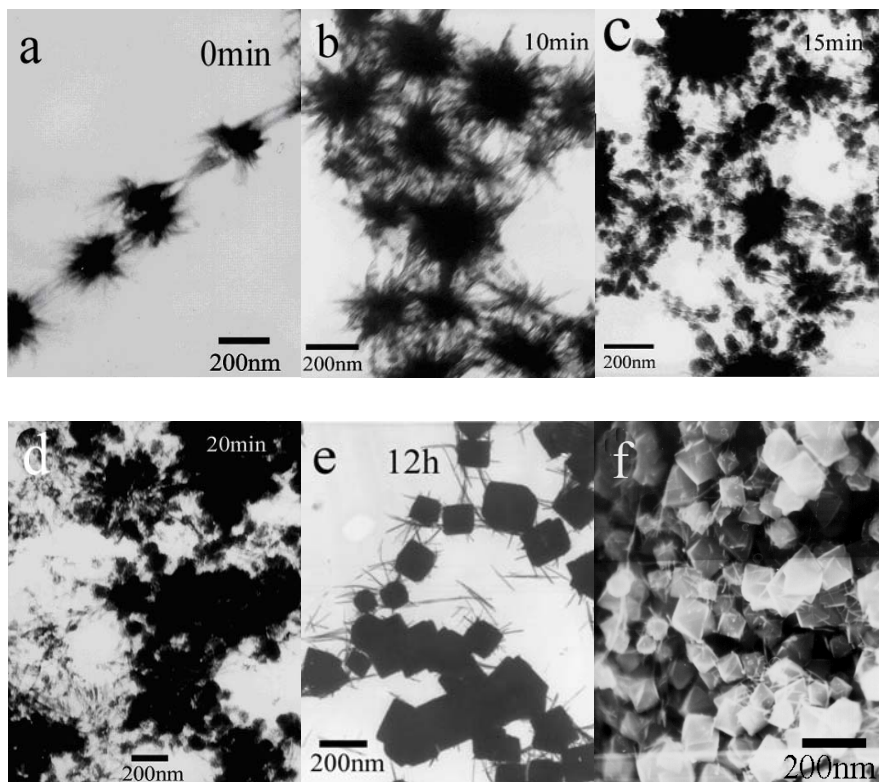

TEM and SEM images of five samples, showing different stages of growth for CeO<sub>2</sub> nanocubes.

(a) 0 min; (b) 10min; (c) 15 min(d) 20min and (e, f) 12h.
